# Supplementary material
Source: publisher site journal article supplement (https://www.dovepress.com/article/442876)
Supplement: Supplementary file 1 [file get_supplementary_file.php]

**Supplementary Materials**

# Figures


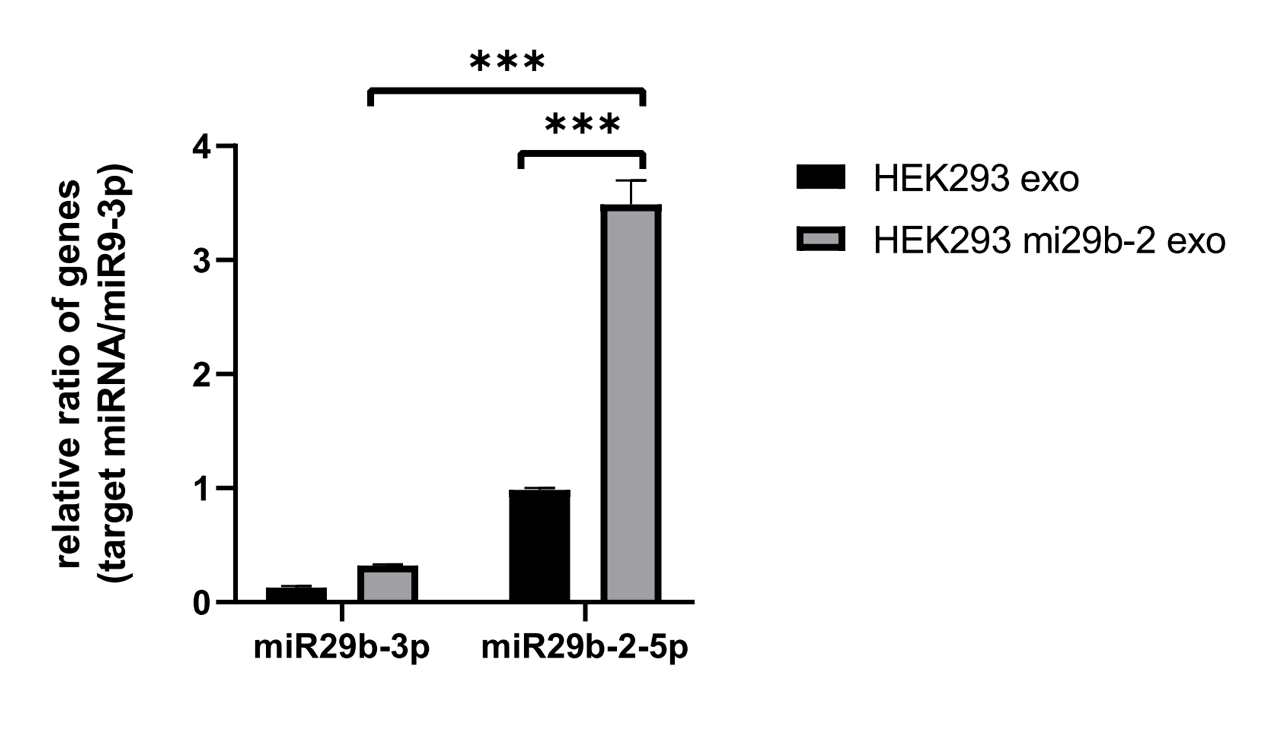


Figure S1. Analysis of the content of two downstream fragments of HEK293 exosomes after transfection with miR29b-2. The exosomes produced by HEK293 cells transfected with miR29b-2 showed increased amounts of miR29b-2-5p fragments compared with miR29b-3p. (***p < 0.001)


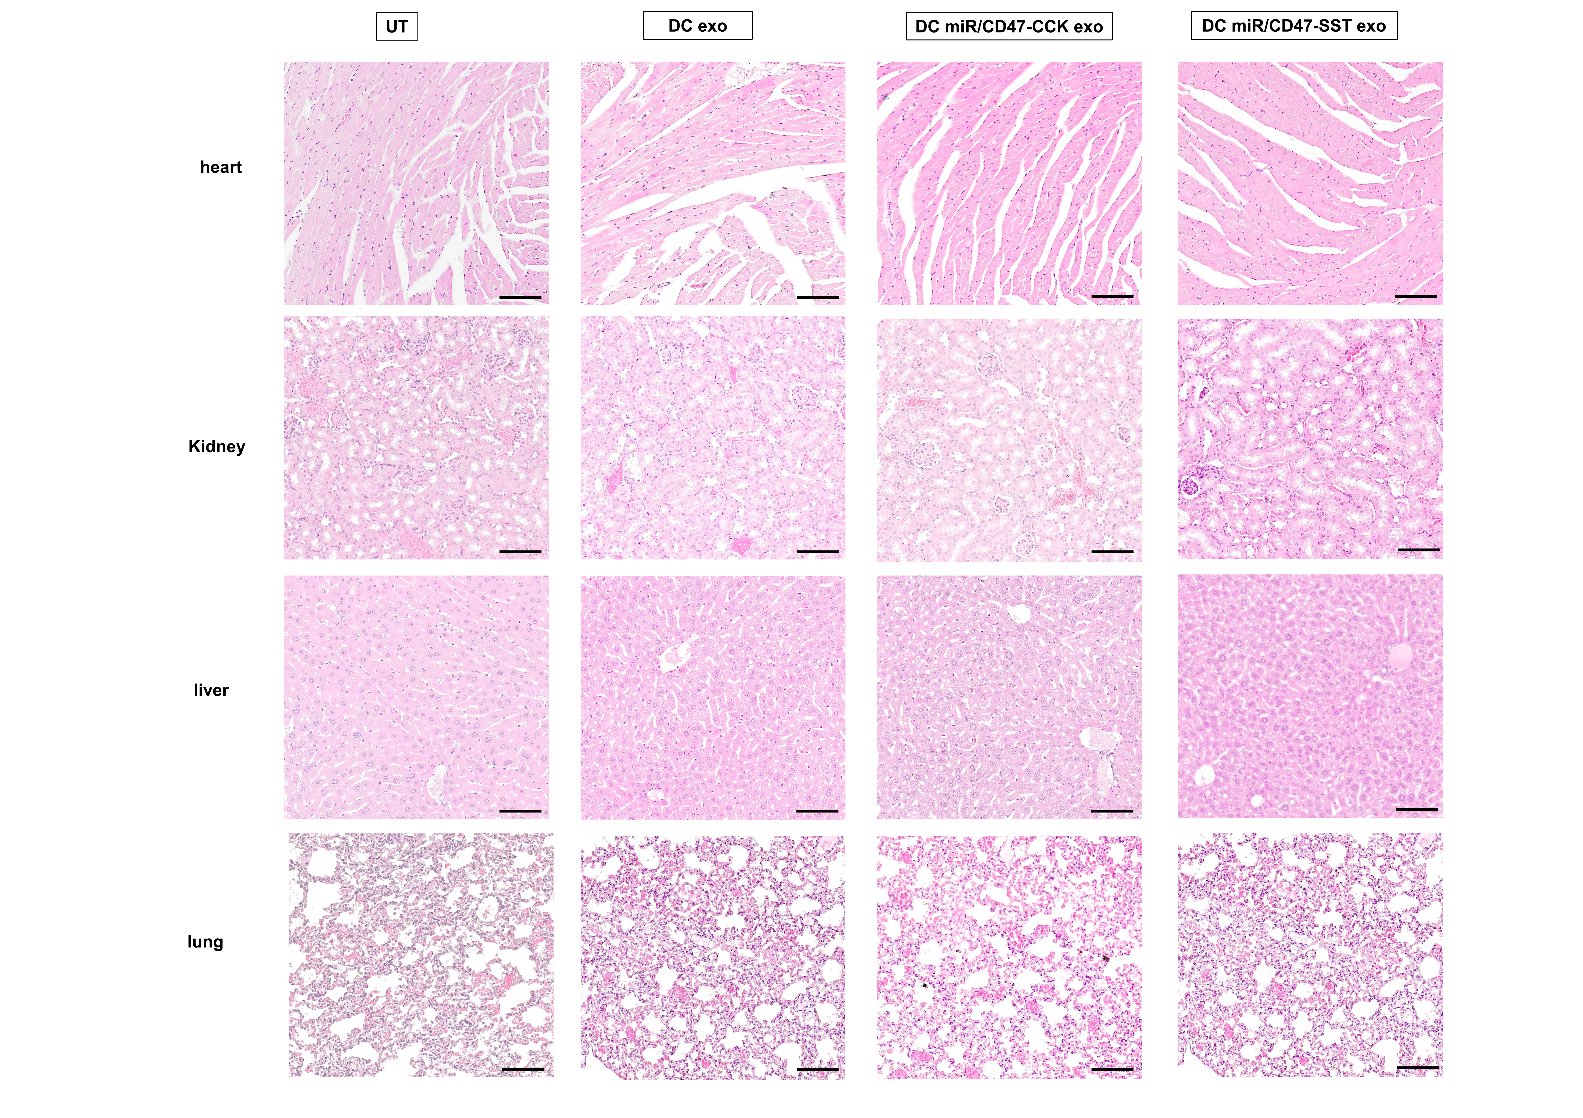


Figure S2. H&E images of main organs after various exosome treatments. H&E staining of the main tissues (heart, kidney liver, lung,) of healthy mice on 1d after injection of various exosomes. (Scale bar represents 100 µm)

# Supplementary Materials and methods

***The quantification of microRNAs in exosomes***

HEK293 cells were cultured in RPMI-1640 medium (CC110-0500, GeneDireX, Taipei, Taiwan) containing 10% FBS (16000044, Gibco, Thermo Fisher Scientific, Massachusetts, USA) and 100 ng/mL penicillin and streptomycin (11548876, Gibco, Thermo Fisher Scientific, Massachusetts, USA) at 37°C with 5% CO2 incubation. To measure the relative content of miR-29b-3p and miR-29b-2-5p, the primer sequence for miR-29b-2-5p is CTGGTTTCACATGGTGGCTTAG, while for miR-29b-3p, the primer sequence is TAGCACCATTTGAAATCAGTGTT, and for internal control miR-9-3p, the sequence is ATAAAGCTAGATAACCGA AAGT.

***Toxic effect assessment***

The exosomes from various groups (DC exo, DC miR exo, DC miR29b/CD47-CCK exo, miR29b/CD47-SST exo) were injected intravenously into nude mice (CANN.Cg-Foxn1nu/CrlNarl). In the following day, the mice were sacrificed, and their organs (heart, liver, lungs, and kidneys) were harvested. Paraffin sections were then prepared from the organs. The slices were stained according to the manufacturer's instructions. The images were acquired using a scanner (VS120-S6, Olympus, Tokyo, Japan).
